# Supplementary material for: Interchain interactions raised the photo-induced [LS] → [HS*] transition temperature to 78 K in a cyanide-bridged [FeIII2CoII] chain
Source: Royal Society of Chemistry journal article supplement (doi:10.1039/d4qi02428a), 2024-11-20
Supplement: d4qi02428a1.pdf [file d4qi02428a1.pdf]

Supplementary Information for

## **Interchain Interactions Raised Photo-Induced [LS]→[HS\*] Transition Temperature up to 78 K in Cyanide-Bridged [Fe<sup>III</sup><sub>2</sub>Co<sup>II</sup>] Chain**

Wen-Jing Jiang,<sup>ab</sup> Yin-Shan Meng,<sup>a</sup> Han-Han Lu,<sup>a</sup> Hai-Lang Zhu,<sup>a</sup> Qiang Liu,<sup>a</sup>  
Chunying Duan,<sup>a</sup> Hiroki Oshio,<sup>\*a</sup> Tao Liu<sup>\*a</sup>

*a State Key Laboratory of Fine Chemicals, Frontier Science Center for Smart Materials, Dalian University of Technology*

*2 Linggong Rd., 116024 Dalian (China)*

*b Fujian Science & Technology Innovation Laboratory for Optoelectronic Information of China, Fujian Institute of Research on the Structure of Matter, Chinese Academy of Sciences*

*Fujian 350108, P. R. Fuzhou (China)*

\* To whom correspondence should be addressed.

E-mail: liutao@dlut.edu.cn and oshio@chem.tsukuba.ac.jp

## Table of Contents

|                                                                         |    |
|-------------------------------------------------------------------------|----|
| Experimental Section .....                                              | 3  |
| Crystallographic data for the LT and HT phases .....                    | 6  |
| Crystallographic data for the LS and photo-excited HS* phases .....     | 13 |
| Schemes of interchain $\pi \cdots \pi$ stacks .....                     | 21 |
| $^{57}\text{Fe}$ Mössbauer spectra for LT and HT phases .....           | 23 |
| UV-vis-NIR absorption spectra .....                                     | 24 |
| Single-chain magnetic properties for the photo-excited HS* phases ..... | 25 |

## Experimental Section

**Materials.** All chemical reagents were commercially available and used without further purification. The building block,  $\text{Li}[\text{Fe}(\text{bipy})(\text{CN})_4]$  (bipy = 2,2'-bipyridine), were synthesized according to the literature method.<sup>[1]</sup>

**Synthesis.** Compound **1-papy** was synthesized by a diffusion method in a test tube. A mixture of methanol/water (1:3, v/v, 3 mL) was gently layered on the top of a solution of  $\text{Co}(\text{ClO}_4)_2 \cdot 6\text{H}_2\text{O}$  (0.0050 mmol) in water (1.0 mL), and then a 1.0 mL methanol solution of  $\text{Li}[\text{Fe}(\text{bipy})(\text{CN})_4] \cdot \text{H}_2\text{O}$  (0.010 mmol) and 4-[(1E)-2-phenyldiazenyl]-pyridine (papy) (0.010 mmol) was added as the third layer. After a few weeks, dark-red flake crystals were obtained. Yield: 43% based on  $\text{Co}(\text{ClO}_4)_2 \cdot 6\text{H}_2\text{O}$ . Anal. Calcd (%) for  $\text{C}_{100}\text{H}_{74}\text{Co}_2\text{Fe}_4\text{N}_{36}\text{O}_3$ : C 55.37, H 3.44, N 23.25; found: C 55.53, H 3.57, N 23.37. Compound **1-pepy** was synthesized by the similar method. Yield: 56% based on  $\text{Co}(\text{ClO}_4)_2 \cdot 6\text{H}_2\text{O}$ . Anal. Calcd (%) for  $\text{C}_{110}\text{H}_{78}\text{Co}_2\text{Fe}_4\text{N}_{28}\text{O}_3$ : C 60.57, H 3.60, N 17.98; found: C 60.73, H 3.54, N 18.09.

**<sup>57</sup>Fe Mössbauer spectra.** <sup>57</sup>Fe Mössbauer spectra were measured with transmission geometry on WSS-10 spectrometer controlled by Wissoft 2003 software. Samples were set in a plastic container and sealed with parafilm. The sample was placed on a copper mount inside the JANIS CCS-800 cryostat system with a helium atmosphere. The temperature was controlled by Cryo-con Model 22C Cryogenic Temperature Controller ranging from 10 K to 300 K. Deconvolution of Mössbauer spectra was carried by least-square fitting using Lorentzian functions (Mosswinn software). The isomer shifts  $\delta$  and quadrupole splitting  $\Delta E_Q$  were calibrated in relation to  $\alpha$ -Fe at 298 K.

**Structure Determination and Refinement.** The single-crystal XRD data were collected on a Bruker D8 VENTURE diffractometer equipped with a CMOS detector using graphite-monochromated Mo  $K\alpha$  radiation ( $\lambda = 0.71073 \text{ \AA}$ ). APEX-III program was used to determine the unit-cell parameters. The data were integrated with the SAINT program and were corrected for the Lorentz factor and polarization effects. Multi-scan absorption corrections were applied using SADABS. The molecular

structures were solved by direct methods and refined by the full-matrix least squares on  $F^2$  using SHELXTL program (version 2014/7). All non-hydrogen atoms were refined anisotropically. The hydrogen atoms of organic ligands were located geometrically and fixed isotropic thermal parameters. Crystal data and the final refinement parameters of the studied compounds were shown in Table S1-S6. The X-ray crystallographic coordinates for structures reported in this Article have been deposited at the Cambridge Crystallographic Data Centre (CCDC), under deposition nos. CCDC-2247067, for **1-papy** at 110 K; -2247068, for **1-papy** at 290 K; -2247069, for **1-papy** at 78 K; -2247070, for **1-papy** after irradiation at 78 K; and -2247071, for **1-pepy** at 110 K; -2247073, for **1-pepy** at 300 K; -2247074, for **1-pepy** at 50 K; -2247075, for **1-pepy** after irradiation at 50 K. These data can be obtained free of charge from CCDC via [http://www.ccdc.cam.ac.uk/data\\_request/cif](http://www.ccdc.cam.ac.uk/data_request/cif).

**UV-vis-NIR Spectra Measurements.** Solid-state UV-vis-NIR absorption spectra were recorded by a UV spectrophotometer (HITACHI-UH4150) equipped with a liquid helium type cryostat (Janis ST-500). The sample was set in a silica glass groove. For the UV-vis-NIR absorption spectra of **1-papy** under irradiation, the sample was continuously irradiated with harmonic of Nd: YAG lasers at 78 K via a flexible optical fiber guided laser diode.

**Magnetic and Photomagnetic Studies.** Magnetic measurements were performed on a Quantum Design SQUID (MPMS XL-7) magnetometer with the polycrystalline samples. Data were corrected for the diamagnetic contribution calculated from Pascal's constants.<sup>[2]</sup> Photomagnetic measurements were equipped with a flexible optical fiber guided laser diode pumped Nd: YAG lasers. The polycrystalline sample were attached to a commercial adhesive tape and placed on the edge of the optical fiber. The photo-irradiation of the sample was carried out by 808-nm laser setting temperature to 10 K and 78 K for **1-papy** and by 808-nm laser setting temperature to 10 K for **1-pepy**, respectively. The temperature-dependent magnetization was measured both before and after irradiation in the temperature range from 2 to 150 K. The difference in the

magnetization before and after irradiation was extracted by subtracting the magnetization value before irradiation from that after irradiation.

## Crystallographic data for the LT and HT phases

**Table S1.** Table of crystallographic parameters for **1-papy** and **1-pepy**.

|                                                | <b>1-papy</b> <sup>110 K</sup>                                                                  | <b>1-papy</b> <sup>290 K</sup>                                                                  | <b>1-pepy</b> <sup>110 K</sup>                                                                  | <b>1-pepy</b> <sup>300 K</sup>                                                                  |
|------------------------------------------------|-------------------------------------------------------------------------------------------------|-------------------------------------------------------------------------------------------------|-------------------------------------------------------------------------------------------------|-------------------------------------------------------------------------------------------------|
| CCDC                                           | 2247067                                                                                         | 2247068                                                                                         | 2247071                                                                                         | 2247073                                                                                         |
| Formula                                        | C <sub>100</sub> H <sub>74</sub> Co <sub>2</sub> Fe <sub>4</sub> N <sub>36</sub> O <sub>3</sub> | C <sub>100</sub> H <sub>74</sub> Co <sub>2</sub> Fe <sub>4</sub> N <sub>36</sub> O <sub>3</sub> | C <sub>110</sub> H <sub>78</sub> Co <sub>2</sub> Fe <sub>4</sub> N <sub>28</sub> O <sub>3</sub> | C <sub>110</sub> H <sub>78</sub> Co <sub>2</sub> Fe <sub>4</sub> N <sub>28</sub> O <sub>3</sub> |
| Fw                                             | 2169.14                                                                                         | 2169.14                                                                                         | 2181.23                                                                                         | 2181.23                                                                                         |
| Crystal system                                 | Triclinic                                                                                       | Triclinic                                                                                       | Triclinic                                                                                       | Triclinic                                                                                       |
| Space group                                    | <i>P</i> $\bar{1}$                                                                              | <i>P</i> $\bar{1}$                                                                              | <i>P</i> $\bar{1}$                                                                              | <i>P</i> $\bar{1}$                                                                              |
| <i>a</i> (Å)                                   | 13.5731(7)                                                                                      | 13.863(3)                                                                                       | 13.4529(14)                                                                                     | 13.8579(12)                                                                                     |
| <i>b</i> (Å)                                   | 14.3430(7)                                                                                      | 14.431(3)                                                                                       | 14.6385(17)                                                                                     | 14.8053(12)                                                                                     |
| <i>c</i> (Å)                                   | 15.6188(7)                                                                                      | 15.991(3)                                                                                       | 15.8026(18)                                                                                     | 16.0832(14)                                                                                     |
| $\alpha$ (°)                                   | 113.6750(10)                                                                                    | 114.141(5)                                                                                      | 111.867(4)                                                                                      | 112.412(2)                                                                                      |
| $\beta$ (°)                                    | 109.519(2)                                                                                      | 110.063(5)                                                                                      | 109.080(4)                                                                                      | 109.571(2)                                                                                      |
| $\gamma$ (°)                                   | 99.1830(10)                                                                                     | 98.012(5)                                                                                       | 100.127(4)                                                                                      | 99.235(2)                                                                                       |
| <i>V</i> (Å <sup>3</sup> )                     | 2468.0(2)                                                                                       | 2591.9(9)                                                                                       | 2567.5(5)                                                                                       | 2712.4(4)                                                                                       |
| <i>Z</i>                                       | 1                                                                                               | 1                                                                                               | 1                                                                                               | 1                                                                                               |
| $\rho_{\text{calc}}$ (g/cm <sup>3</sup> )      | 1.455                                                                                           | 1.386                                                                                           | 1.404                                                                                           | 1.329                                                                                           |
| $\mu$ (mm <sup>-1</sup> )                      | 0.971                                                                                           | 0.925                                                                                           | 0.932                                                                                           | 0.882                                                                                           |
| $\theta_{\text{min}}, \theta_{\text{max}}$ (°) | 4.506 to 49.998                                                                                 | 4.392 to 49.998                                                                                 | 4.878 to 54.99                                                                                  | 3.738 to 50.054                                                                                 |
| Refins. (all data)                             | 19158                                                                                           | 18665                                                                                           | 95194                                                                                           | 69836                                                                                           |
| Refins [ $I \geq 2\sigma(I)$ ]                 | 8670                                                                                            | 9015                                                                                            | 11762                                                                                           | 9573                                                                                            |
| $R_{\text{int}}$                               | 0.1237                                                                                          | 0.0698                                                                                          | 0.0419                                                                                          | 0.0506                                                                                          |
| $R_1, wR_2$ [ $I \geq 2\sigma(I)$ ]            | 0.0671, 0.1702                                                                                  | 0.0663, 0.1251                                                                                  | 0.0384, 0.1070                                                                                  | 0.0635, 0.1935                                                                                  |
| $R_1, wR_2$ (all data)                         | 0.1023, 0.1836                                                                                  | 0.1301, 0.1417                                                                                  | 0.0471, 0.1142                                                                                  | 0.0820, 0.2123                                                                                  |
| GOF                                            | 1.054                                                                                           | 1.058                                                                                           | 1.033                                                                                           | 1.061                                                                                           |

$$R_1 = \Sigma(|F_0| - |F_c|) / \Sigma|F_0|; wR_2 = [\Sigma w(|F_0| - |F_c|)^2 / \Sigma wF_0^2]^{1/2}.$$

**Table S2.** Selected bond lengths (Å) for compound **1-papy** at 110 K and 290 K.

| <b>1-papy</b> <sup>110 K</sup> |          | <b>1-papy</b> <sup>290 K</sup> |          |
|--------------------------------|----------|--------------------------------|----------|
| Co1–N1                         | 1.900(4) | Co1–N1                         | 2.091(4) |
| Co1–N1 <sup>1</sup>            | 1.900(4) | Co1–N1 <sup>1</sup>            | 2.091(4) |
| Co1–N5 <sup>2</sup>            | 1.890(5) | Co1–N5 <sup>2</sup>            | 2.098(4) |
| Co1–N5 <sup>3</sup>            | 1.890(5) | Co1–N5 <sup>3</sup>            | 2.098(4) |
| Co1–N13                        | 1.977(4) | Co1–N13                        | 2.164(4) |
| Co1–N13 <sup>1</sup>           | 1.977(4) | Co1–N13 <sup>1</sup>           | 2.164(4) |
| Co2–N16                        | 1.973(4) | Co2–N16 <sup>3</sup>           | 2.166(4) |
| Co2–N16 <sup>3</sup>           | 1.973(4) | Co2–N16                        | 2.166(4) |
| Co2–N2                         | 1.891(5) | Co2–N2                         | 2.112(4) |
| Co2–N2 <sup>3</sup>            | 1.891(5) | Co2–N2 <sup>3</sup>            | 2.112(4) |
| Co2–N6 <sup>3</sup>            | 1.886(4) | Co2–N6 <sup>3</sup>            | 2.063(4) |
| Co2–N6                         | 1.886(4) | Co2–N6                         | 2.063(4) |
| Fe2–N12                        | 1.983(5) | Fe2–N12                        | 1.991(3) |
| Fe2–N11                        | 1.994(4) | Fe2–N11                        | 1.986(4) |
| Fe2–C7                         | 1.943(6) | Fe2–C7                         | 1.960(6) |
| Fe2–C6                         | 1.893(5) | Fe2–C6                         | 1.890(5) |
| Fe2–C5                         | 1.877(6) | Fe2–C5                         | 1.917(5) |
| Fe2–C8                         | 1.933(6) | Fe2–C8                         | 1.955(6) |
| Fe1–N10                        | 1.971(4) | Fe1–N10                        | 1.978(4) |
| Fe1–N9                         | 1.984(4) | Fe1–N9                         | 1.968(4) |
| Fe1–C2                         | 1.881(6) | Fe1–C2                         | 1.913(5) |
| Fe1–C3                         | 1.950(6) | Fe1–C3                         | 1.940(5) |
| Fe1–C1                         | 1.892(5) | Fe1–C1                         | 1.890(5) |
| Fe1–C4                         | 1.947(6) | Fe1–C4                         | 1.946(5) |

Symmetry transformations used to generate equivalent atoms:

<sup>1</sup>-X, 1-Y, 1-Z; <sup>2</sup>-1+X, +Y, +Z; <sup>3</sup>1-X, 1-Y, 1-Z (**1-papy**<sup>110 K</sup>)

<sup>1</sup>-X, 1-Y, 1-Z; <sup>2</sup>-1+X, +Y, +Z; <sup>3</sup>1-X, 1-Y, 1-Z; <sup>4</sup>1-X, 2-Y, 2-Z (**1-papy**<sup>290 K</sup>)

**Table S3.** Selected bond lengths (Å) for compound **1-pepy** at 110 K and 300 K.

| <b>1-pepy</b> <sup>110 K</sup> |            | <b>1-pepy</b> <sup>300 K</sup> |          |
|--------------------------------|------------|--------------------------------|----------|
| Co1–N1 <sup>1</sup>            | 1.8881(18) | Co1–N1 <sup>2</sup>            | 2.088(4) |
| Co1–N1                         | 1.8881(18) | Co1–N1                         | 2.088(4) |
| Co1–N5 <sup>2</sup>            | 1.8946(18) | Co1–N5 <sup>3</sup>            | 2.099(4) |
| Co1–N5 <sup>3</sup>            | 1.8946(18) | Co1–N5 <sup>1</sup>            | 2.099(4) |
| Co1–N13 <sup>1</sup>           | 1.9628(18) | Co1–N13 <sup>2</sup>           | 2.145(4) |
| Co1–N13                        | 1.9628(18) | Co1–N13                        | 2.145(4) |
| Co2–N2                         | 1.9154(19) | Co2–N2 <sup>1</sup>            | 2.112(4) |
| Co2–N2 <sup>3</sup>            | 1.9154(19) | Co2–N2                         | 2.112(4) |
| Co2–N14 <sup>3</sup>           | 1.9819(19) | Co2–N6 <sup>1</sup>            | 2.072(4) |
| Co2–N14                        | 1.9818(19) | Co2–N6                         | 2.072(4) |
| Co2–N6 <sup>3</sup>            | 1.8917(18) | Co2–N14                        | 2.166(4) |
| Co2–N6                         | 1.8917(18) | Co2–N14 <sup>1</sup>           | 2.166(4) |
| Fe2–C6                         | 1.884(2)   | Fe1–C2                         | 1.915(4) |
| Fe2–C5                         | 1.904(2)   | Fe1–C3                         | 1.953(5) |
| Fe2–C7                         | 1.948(2)   | Fe1–C1                         | 1.903(4) |
| Fe2–C8                         | 1.949(2)   | Fe1–C4                         | 1.945(5) |
| Fe2–N12                        | 1.9862(19) | Fe1–N9                         | 1.979(4) |
| Fe2–N11                        | 1.9833(18) | Fe1–N10                        | 1.975(4) |
| Fe1–C1                         | 1.882(2)   | Fe2–C5                         | 1.917(4) |
| Fe1–C2                         | 1.891(2)   | Fe2–C6                         | 1.900(4) |
| Fe1–C4                         | 1.944(2)   | Fe2–C8                         | 1.947(5) |
| Fe1–C3                         | 1.951(2)   | Fe2–C7                         | 1.937(5) |
| Fe1–N9                         | 1.9892(19) | Fe2–N11                        | 1.977(3) |
| Fe1–N10                        | 1.983(2)   | Fe2–N12                        | 1.984(3) |

Symmetry transformations used to generate equivalent atoms:

<sup>1</sup>-X,-Y,-Z; <sup>2</sup>-1+X,+Y,+Z; <sup>3</sup>1-X,-Y,-Z (**1-pepy**<sup>110 K</sup>)<sup>1</sup>1-X,2-Y,1-Z; <sup>2</sup>-X,2-Y,1-Z; <sup>3</sup>-1+X,+Y,+Z (**1-pepy**<sup>300 K</sup>)



**Table S4.** Selected angles (°) for compound **1-papy** at 110 K and 290 K.

| <b>1-papy</b> <sup>110 K</sup>        |            | <b>1-papy</b> <sup>290 K</sup>        |            |
|---------------------------------------|------------|---------------------------------------|------------|
| N1–Co1–N1 <sup>1</sup>                | 180.0(2)   | N1–Co1–N1 <sup>1</sup>                | 180.0      |
| N1–Co1–N13                            | 89.27(16)  | N1 <sup>1</sup> –Co1–N5 <sup>2</sup>  | 88.56(14)  |
| N1–Co1–N13 <sup>1</sup>               | 90.73(16)  | N1 <sup>1</sup> –Co1–N5 <sup>3</sup>  | 91.44(14)  |
| N1 <sup>1</sup> –Co1–N13 <sup>1</sup> | 89.27(16)  | N1–Co1–N5 <sup>2</sup>                | 91.44(14)  |
| N1 <sup>1</sup> –Co1–N13              | 90.73(16)  | N1–Co1–N5 <sup>3</sup>                | 88.56(14)  |
| N5 <sup>2</sup> –Co1–N1 <sup>1</sup>  | 90.91(18)  | N1–Co1–N13 <sup>1</sup>               | 90.93(15)  |
| N5 <sup>2</sup> –Co1–N1               | 89.09(17)  | N1 <sup>1</sup> –Co1–N13              | 90.93(15)  |
| N5 <sup>3</sup> –Co1–N1               | 90.91(18)  | N1–Co1–N13                            | 89.07(15)  |
| N5 <sup>3</sup> –Co1–N1 <sup>1</sup>  | 89.09(17)  | N1 <sup>1</sup> –Co1–N13 <sup>1</sup> | 89.07(15)  |
| N5 <sup>3</sup> –Co1–N5 <sup>2</sup>  | 180.0      | N5 <sup>2</sup> –Co1–N5 <sup>3</sup>  | 180.0      |
| N5 <sup>2</sup> –Co1–N13 <sup>1</sup> | 88.66(18)  | N5 <sup>3</sup> –Co1–N13 <sup>1</sup> | 88.99(15)  |
| N5 <sup>2</sup> –Co1–N13              | 91.34(18)  | N5 <sup>3</sup> –Co1–N13              | 91.00(15)  |
| N5 <sup>3</sup> –Co1–N13              | 88.66(18)  | N5 <sup>2</sup> –Co1–N13              | 89.00(15)  |
| N5 <sup>3</sup> –Co1–N13 <sup>1</sup> | 91.34(18)  | N5 <sup>2</sup> –Co1–N13 <sup>1</sup> | 91.01(15)  |
| N13 <sup>1</sup> –Co1–N13             | 180.0(3)   | N13 <sup>1</sup> –Co1–N13             | 180.0      |
| N16 <sup>3</sup> –Co2–N16             | 180.0      | N16–Co2–N16 <sup>2</sup>              | 180.0      |
| N2–Co2–N16 <sup>3</sup>               | 92.51(17)  | N2–Co2–N16                            | 86.20(15)  |
| N2 <sup>3</sup> –Co2–N16 <sup>3</sup> | 87.49(17)  | N2–Co2–N16 <sup>2</sup>               | 93.79(15)  |
| N2 <sup>3</sup> –Co2–N16              | 92.51(17)  | N2 <sup>2</sup> –Co2–N16 <sup>2</sup> | 86.21(15)  |
| N2–Co2–N16                            | 87.49(17)  | N2 <sup>2</sup> –Co2–N16              | 93.80(15)  |
| N2 <sup>3</sup> –Co2–N2               | 180.0      | N2 <sup>2</sup> –Co2–N2               | 180.0      |
| N6 <sup>3</sup> –Co2–N16 <sup>3</sup> | 89.87(17)  | N6 <sup>2</sup> –Co2–N16              | 90.31(16)  |
| N6–Co2–N16 <sup>3</sup>               | 90.13(17)  | N6 <sup>2</sup> –Co2–N16 <sup>2</sup> | 89.69(16)  |
| N6–Co2–N16                            | 89.87(17)  | N6–Co2–N16                            | 89.69(16)  |
| N6 <sup>3</sup> –Co2–N16              | 90.13(17)  | N6–Co2–N16 <sup>2</sup>               | 90.31(16)  |
| N6–Co2–N2                             | 89.11(17)  | N6 <sup>2</sup> –Co2–N2               | 91.26(14)  |
| N6 <sup>3</sup> –Co2–N2               | 90.89(18)  | N6–Co2–N2                             | 88.75(14)  |
| N6–Co2–N2 <sup>3</sup>                | 90.89(18)  | N6–Co2–N2 <sup>2</sup>                | 91.25(14)  |
| N6 <sup>3</sup> –Co2–N2 <sup>3</sup>  | 89.12(17)  | N6 <sup>2</sup> –Co2–N2 <sup>2</sup>  | 88.74(14)  |
| N6 <sup>3</sup> –Co2–N6               | 180.00(11) | N6–Co2–N6 <sup>2</sup>                | 180.0      |
| Σ <sub>Co1</sub>                      | 11.92      | Σ <sub>Co1</sub>                      | 13.5       |
| Σ <sub>Co2</sub>                      | 14.12      | Σ <sub>Co2</sub>                      | 21.44      |
| N12–Fe2–N11                           | 81.06(17)  | N11–Fe2–N12                           | 81.20(15)  |
| C7–Fe2–N12                            | 91.9(2)    | C7–Fe2–N12                            | 90.78(18)  |
| C7–Fe2–N11                            | 93.21(18)  | C7–Fe2–N11                            | 92.88(17)  |
| C6–Fe2–N12                            | 94.17(19)  | C6–Fe2–N12                            | 95.93(17)  |
| C6–Fe2–N11                            | 174.66(19) | C6–Fe2–N11                            | 176.64(17) |
| C6–Fe2–C7                             | 89.3(2)    | C6–Fe2–C7                             | 88.91(19)  |
| C6–Fe2–C8                             | 88.8(2)    | C6–Fe2–C5                             | 84.91(18)  |
| C5–Fe2–N12                            | 177.03(18) | C6–Fe2–C8                             | 88.4(2)    |
| C5–Fe2–N11                            | 96.09(19)  | C5–Fe2–N12                            | 178.93(17) |
| C5–Fe2–C7                             | 89.1(2)    | C5–Fe2–N11                            | 97.94(17)  |
| C5–Fe2–C6                             | 88.6(2)    | C5–Fe2–C7                             | 89.9(2)    |
| C5–Fe2–C8                             | 87.5(2)    | C5–Fe2–C8                             | 88.3(2)    |
| C8–Fe2–N12                            | 91.6(2)    | C8–Fe2–N12                            | 91.11(19)  |
| C8–Fe2–N11                            | 88.90(18)  | C8–Fe2–N11                            | 89.93(18)  |
| C8–Fe2–C7                             | 176.1(2)   | C8–Fe2–C7                             | 176.8(2)   |
| N10–Fe1–N9                            | 81.51(18)  | N9–Fe1–N10                            | 81.43(17)  |
| C2–Fe1–N10                            | 177.4(2)   | C2–Fe1–N10                            | 179.08(17) |
| C2–Fe1–N9                             | 96.78(19)  | C2–Fe1–N9                             | 97.69(18)  |
| C2–Fe1–C3                             | 90.4(2)    | C2–Fe1–C3                             | 91.7(2)    |
| C2–Fe1–C1                             | 86.2(2)    | C2–Fe1–C4                             | 90.73(19)  |
| C2–Fe1–C4                             | 91.1(2)    | C3–Fe1–N10                            | 88.05(19)  |
| C3–Fe1–N10                            | 87.6(2)    | C3–Fe1–N9                             | 89.79(18)  |
| C3–Fe1–N9                             | 89.27(19)  | C3–Fe1–C4                             | 177.6(2)   |
| C1–Fe1–N10                            | 95.50(19)  | C1–Fe1–N10                            | 97.08(18)  |

|                        |            |                        |            |
|------------------------|------------|------------------------|------------|
| C1–Fe1–N9              | 176.93(19) | C1–Fe1–N9              | 178.33(18) |
| C1–Fe1–C3              | 89.9(2)    | C1–Fe1–C2              | 83.80(18)  |
| C1–Fe1–C4              | 91.4(2)    | C1–Fe1–C3              | 89.40(19)  |
| C4–Fe1–N10             | 90.8(2)    | C1–Fe1–C4              | 91.22(19)  |
| C4–Fe1–N9              | 89.38(19)  | C4–Fe1–N10             | 89.54(18)  |
| C4–Fe1–C3              | 178.1(2)   | C4–Fe1–N9              | 89.52(17)  |
| C1–N1–Co1              | 168.2(4)   | C1–N1–Co1              | 166.1(4)   |
| C2–N2–Co2              | 163.4(4)   | C2–N2–Co2              | 159.7(4)   |
| C5–N5–Co1 <sup>4</sup> | 174.5(4)   | C5–N5–Co1 <sup>4</sup> | 177.6(4)   |
| C6–N6–Co2              | 172.8(4)   | C6–N6–Co2              | 175.0(4)   |
| N2–C2–Fe1              | 175.2(4)   | N2–C2–Fe1              | 177.3(4)   |
| N7–C7–Fe2              | 176.4(5)   | N7–C7–Fe2              | 178.3(5)   |
| N6–C6–Fe2              | 179.0(5)   | N6–C6–Fe2              | 179.0(5)   |
| N3–C3–Fe1              | 176.6(5)   | N3–C3–Fe1              | 175.3(5)   |
| N5–C5–Fe2              | 177.3(4)   | N5–C5–Fe2              | 177.8(4)   |
| N8–C8–Fe2              | 177.4(6)   | N8–C8–Fe2              | 179.4(5)   |
| N1–C1–Fe1              | 176.3(5)   | N1–C1–Fe1              | 177.3(4)   |
| N4–C4–Fe1              | 177.6(5)   | N4–C4–Fe1              | 176.8(5)   |

---

Symmetry transformations used to generate equivalent atoms:

<sup>1</sup>-X, 1-Y, 1-Z; <sup>2</sup>-1+X, +Y, +Z; <sup>3</sup>1-X, 1-Y, 1-Z; <sup>4</sup>1+X, +Y, +Z (**1-papy**<sup>110</sup> K)

<sup>1</sup>-X, 1-Y, 1-Z; <sup>2</sup>1-X, 1-Y, 1-Z; <sup>3</sup>-1+X, +Y, +Z; <sup>4</sup>1+X, +Y, +Z (**1-papy**<sup>290</sup> K)

**Table S5.** Selected angles ( $^{\circ}$ ) for compound **1-pepy** at 110 K and 300 K.

| <b>1-pepy</b> <sup>110 K</sup>        |            | <b>1-pepy</b> <sup>300 K</sup>        |            |
|---------------------------------------|------------|---------------------------------------|------------|
| N1 <sup>1</sup> -Co1-N1               | 180.0      | N13 <sup>2</sup> -Co1-N13             | 180.0      |
| N1-Co1-N5 <sup>2</sup>                | 91.19(8)   | N5 <sup>3</sup> -Co1-N13 <sup>2</sup> | 89.58(15)  |
| N1-Co1-N5 <sup>3</sup>                | 88.81(8)   | N5 <sup>1</sup> -Co1-N13 <sup>2</sup> | 90.42(15)  |
| N1 <sup>1</sup> -Co1-N5 <sup>2</sup>  | 88.80(8)   | N5 <sup>1</sup> -Co1-N13              | 89.58(15)  |
| N1 <sup>1</sup> -Co1-N5 <sup>3</sup>  | 91.20(8)   | N5 <sup>3</sup> -Co1-N13              | 90.42(15)  |
| N1-Co1-N13 <sup>1</sup>               | 90.55(8)   | N5 <sup>1</sup> -Co1-N5 <sup>3</sup>  | 180.0      |
| N1-Co1-N13                            | 89.45(8)   | N1-Co1-N13 <sup>2</sup>               | 91.13(15)  |
| N1 <sup>1</sup> -Co1-N13              | 90.55(8)   | N1 <sup>2</sup> -Co1-N13 <sup>2</sup> | 88.87(15)  |
| N1 <sup>1</sup> -Co1-N13 <sup>1</sup> | 89.45(8)   | N1-Co1-N13                            | 88.87(15)  |
| N5 <sup>2</sup> -Co1-N5 <sup>3</sup>  | 180.00(16) | N1 <sup>2</sup> -Co1-N13              | 91.13(15)  |
| N5 <sup>3</sup> -Co1-N13              | 90.60(8)   | N1-Co1-N5 <sup>1</sup>                | 91.28(15)  |
| N5 <sup>2</sup> -Co1-N13              | 89.40(8)   | N1 <sup>2</sup> -Co1-N5 <sup>3</sup>  | 91.28(15)  |
| N5 <sup>2</sup> -Co1-N13 <sup>1</sup> | 90.60(8)   | N1 <sup>2</sup> -Co1-N5 <sup>1</sup>  | 88.72(15)  |
| N5 <sup>3</sup> -Co1-N13 <sup>1</sup> | 89.40(8)   | N1-Co1-N5 <sup>3</sup>                | 88.72(15)  |
| N13 <sup>1</sup> -Co1-N13             | 180.00(12) | N1 <sup>2</sup> -Co1-N1               | 180.0      |
| N2-Co2-N2 <sup>2</sup>                | 180.0      | N14-Co2-N14 <sup>1</sup>              | 180.0      |
| N2-Co2-N14                            | 86.81(8)   | N6 <sup>1</sup> -Co2-N14              | 90.27(15)  |
| N2 <sup>2</sup> -Co2-N14              | 93.19(8)   | N6 <sup>1</sup> -Co2-N14 <sup>1</sup> | 89.73(15)  |
| N2 <sup>2</sup> -Co2-N14 <sup>2</sup> | 86.81(8)   | N6-Co2-N14 <sup>1</sup>               | 90.27(15)  |
| N2-Co2-N14 <sup>2</sup>               | 93.19(8)   | N6-Co2-N14                            | 89.73(15)  |
| N14-Co2-N14 <sup>2</sup>              | 180.0      | N6 <sup>1</sup> -Co2-N6               | 180.0      |
| N6-Co2-N2 <sup>2</sup>                | 90.87(8)   | N6 <sup>1</sup> -Co2-N2 <sup>1</sup>  | 89.14(14)  |
| N6-Co2-N2                             | 89.13(8)   | N6-Co2-N2 <sup>1</sup>                | 90.87(14)  |
| N6 <sup>2</sup> -Co2-N2 <sup>2</sup>  | 89.13(8)   | N6 <sup>1</sup> -Co2-N2               | 90.86(14)  |
| N6 <sup>2</sup> -Co2-N2               | 90.87(8)   | N6-Co2-N2                             | 89.13(14)  |
| N6 <sup>2</sup> -Co2-N14 <sup>2</sup> | 90.05(8)   | N2 <sup>1</sup> -Co2-N14 <sup>1</sup> | 85.53(14)  |
| N6-Co2-N14                            | 90.05(8)   | N2-Co2-N14 <sup>1</sup>               | 94.47(14)  |
| N6 <sup>2</sup> -Co2-N14              | 89.95(8)   | N2 <sup>1</sup> -Co2-N14              | 94.47(14)  |
| N6-Co2-N14 <sup>2</sup>               | 89.95(8)   | N2-Co2-N14                            | 85.53(14)  |
| N6-Co2-N6 <sup>2</sup>                | 180.00(9)  | N2 <sup>1</sup> -Co2-N2               | 180.0      |
| $\Sigma_{Co1}$                        | 9.38       | $\Sigma_{Co1}$                        | 11.32      |
| $\Sigma_{Co2}$                        | 16.44      | $\Sigma_{Co2}$                        | 22.42      |
| C6-Fe2-C5                             | 87.35(9)   | N10-Fe1-N9                            | 81.03(17)  |
| C6-Fe2-C7                             | 90.14(9)   | C2-Fe1-N9                             | 97.55(17)  |
| C6-Fe2-C8                             | 89.04(10)  | C2-Fe1-N10                            | 178.52(17) |
| C6-Fe2-N12                            | 94.46(8)   | C2-Fe1-C3                             | 92.41(19)  |
| C6-Fe2-N11                            | 175.22(8)  | C2-Fe1-C4                             | 90.08(19)  |
| C5-Fe2-C7                             | 88.82(9)   | C3-Fe1-N9                             | 90.59(18)  |
| C5-Fe2-C8                             | 87.13(10)  | C3-Fe1-N10                            | 88.03(18)  |
| C5-Fe2-N12                            | 178.05(8)  | C1-Fe1-N9                             | 178.53(17) |
| C5-Fe2-N11                            | 96.90(8)   | C1-Fe1-N10                            | 97.51(17)  |
| C7-Fe2-C8                             | 175.90(10) | C1-Fe1-C2                             | 83.91(18)  |
| C7-Fe2-N12                            | 90.44(9)   | C1-Fe1-C3                             | 89.15(19)  |
| C7-Fe2-N11                            | 92.12(9)   | C1-Fe1-C4                             | 90.36(18)  |
| C8-Fe2-N12                            | 93.63(9)   | C4-Fe1-N9                             | 89.84(17)  |
| C8-Fe2-N11                            | 89.00(9)   | C4-Fe1-N10                            | 89.49(18)  |
| N11-Fe2-N12                           | 81.32(8)   | C4-Fe1-C3                             | 177.39(19) |
| C1-Fe1-C2                             | 85.82(9)   | N11-Fe2-N12                           | 81.09(15)  |
| C1-Fe1-C4                             | 90.78(9)   | C5-Fe2-N12                            | 178.72(17) |
| C1-Fe1-C3                             | 89.27(9)   | C5-Fe2-N11                            | 98.07(16)  |
| C1-Fe1-N10                            | 96.07(9)   | C5-Fe2-C8                             | 88.3(2)    |
| C1-Fe1-N9                             | 177.25(9)  | C5-Fe2-C7                             | 88.56(19)  |
| C2-Fe1-C4                             | 89.86(9)   | C6-Fe2-N12                            | 95.87(16)  |
| C2-Fe1-C3                             | 92.78(9)   | C6-Fe2-N11                            | 176.57(16) |
| C2-Fe1-N10                            | 178.11(8)  | C6-Fe2-C5                             | 85.00(18)  |
| C2-Fe1-N9                             | 96.93(8)   | C6-Fe2-C8                             | 88.68(19)  |

|                        |            |                        |           |
|------------------------|------------|------------------------|-----------|
| C4–Fe1–C3              | 177.36(10) | C6–Fe2–C7              | 89.28(19) |
| C4–Fe1–N10             | 90.32(9)   | C8–Fe2–N12             | 92.66(19) |
| C4–Fe1–N9              | 89.46(9)   | C8–Fe2–N11             | 89.87(18) |
| C3–Fe1–N10             | 87.05(9)   | C7–Fe2–N12             | 90.51(18) |
| C3–Fe1–N9              | 90.36(9)   | C7–Fe2–N11             | 92.33(18) |
| N10–Fe1–N9             | 81.19(8)   | C7–Fe2–C8              | 176.4(2)  |
| N1–C1–Fe1              | 176.3(2)   | N1–C1–Fe1              | 176.1(4)  |
| N2–C2–Fe1              | 177.52(19) | N3–C3–Fe1              | 175.1(5)  |
| N4–C4–Fe1              | 178.4(2)   | N2–C2–Fe1              | 177.6(4)  |
| N3–C3–Fe1              | 175.3(2)   | N4–C4–Fe1              | 177.0(5)  |
| N6–C6–Fe2              | 178.4(2)   | N5–C5–Fe2              | 177.6(4)  |
| N5–C5–Fe2              | 178.07(19) | N6–C6–Fe2              | 179.0(4)  |
| N7–C7–Fe2              | 178.9(2)   | N7–C7–Fe2              | 179.6(5)  |
| N8–C8–Fe2              | 176.1(2)   | N8–C8–Fe2              | 179.8(7)  |
| C1–N1–Co1              | 170.82(19) | C1–N1–Co1              | 170.1(4)  |
| C5–N5–Co1 <sup>4</sup> | 176.17(18) | C5–N5–Co1 <sup>4</sup> | 177.1(4)  |
| C2–N2–Co2              | 158.49(18) | C2–N2–Co2              | 158.6(4)  |
| C6–N6–Co2              | 175.64(18) | C6–N6–Co2              | 175.5(4)  |

---

Symmetry transformations used to generate equivalent atoms:

<sup>1</sup>-X,-Y,-Z; <sup>2</sup>-1+X,+Y,+Z; <sup>3</sup>1-X,-Y,-Z; <sup>4</sup>-X,1-Y,-Z (**1-pepy**<sup>110</sup> K)

<sup>1</sup>1-X,2-Y,1-Z; <sup>2</sup>-X,2-Y,1-Z; <sup>3</sup>-1+X,+Y,+Z; <sup>4</sup>1+X,+Y,+Z (**1-pepy**<sup>300</sup> K)

# Crystallographic data for the LS and photo-excited HS\* phases

**Table S6.** Table of crystallographic parameters for **1-papy** and **1-pepy** before and after 808-nm laser irradiation at 78 and 50 K, respectively.

|                                                                                      | <b>1-papy</b> <sup>78 K</sup>                                                                   | <b>1-papy</b> <sup>808 nm</sup>                                                                 | <b>1-pepy</b> <sup>50 K</sup>                                                                   | <b>1-pepy</b> <sup>808 nm</sup>                                                                 |
|--------------------------------------------------------------------------------------|-------------------------------------------------------------------------------------------------|-------------------------------------------------------------------------------------------------|-------------------------------------------------------------------------------------------------|-------------------------------------------------------------------------------------------------|
| CCDC                                                                                 | 2247069                                                                                         | 2247070                                                                                         | 2247074                                                                                         | 2247075                                                                                         |
| Formula                                                                              | C <sub>100</sub> H <sub>74</sub> Co <sub>2</sub> Fe <sub>4</sub> N <sub>36</sub> O <sub>3</sub> | C <sub>100</sub> H <sub>74</sub> Co <sub>2</sub> Fe <sub>4</sub> N <sub>36</sub> O <sub>3</sub> | C <sub>110</sub> H <sub>78</sub> Co <sub>2</sub> Fe <sub>4</sub> N <sub>28</sub> O <sub>3</sub> | C <sub>110</sub> H <sub>78</sub> Co <sub>2</sub> Fe <sub>4</sub> N <sub>28</sub> O <sub>3</sub> |
| Fw                                                                                   | 2169.14                                                                                         | 2169.14                                                                                         | 2181.23                                                                                         | 2181.23                                                                                         |
| Crystal system                                                                       | Triclinic                                                                                       | Triclinic                                                                                       | Triclinic                                                                                       | Triclinic                                                                                       |
| Space group                                                                          | <i>P</i> $\bar{1}$                                                                              | <i>P</i> $\bar{1}$                                                                              | <i>P</i> $\bar{1}$                                                                              | <i>P</i> $\bar{1}$                                                                              |
| <i>a</i> (Å)                                                                         | 13.6276(15)                                                                                     | 13.8374(13)                                                                                     | 13.4126(4)                                                                                      | 13.6686(11)                                                                                     |
| <i>b</i> (Å)                                                                         | 14.3424(16)                                                                                     | 14.4192(14)                                                                                     | 14.6128(6)                                                                                      | 14.8739(12)                                                                                     |
| <i>c</i> (Å)                                                                         | 15.6194(18)                                                                                     | 15.8950(15)                                                                                     | 15.7476(6)                                                                                      | 16.0438(13)                                                                                     |
| $\alpha$ (°)                                                                         | 113.678(3)                                                                                      | 114.184(3)                                                                                      | 112.0100(10)                                                                                    | 112.159(2)                                                                                      |
| $\beta$ (°)                                                                          | 109.594(3)                                                                                      | 110.012(3)                                                                                      | 109.1130(10)                                                                                    | 110.128(3)                                                                                      |
| $\gamma$ (°)                                                                         | 99.000(3)                                                                                       | 98.189(3)                                                                                       | 99.9300(10)                                                                                     | 100.153(3)                                                                                      |
| <i>V</i> (Å <sup>3</sup> )                                                           | 2479.5(5)                                                                                       | 2566.4(4)                                                                                       | 2545.68(16)                                                                                     | 2654.9(4)                                                                                       |
| <i>Z</i>                                                                             | 1                                                                                               | 1                                                                                               | 1                                                                                               | 1                                                                                               |
| $\rho_{\text{calc}}$ (g/cm <sup>3</sup> )                                            | 1.449                                                                                           | 1.400                                                                                           | 1.416                                                                                           | 1.358                                                                                           |
| $\mu$ (mm <sup>-1</sup> )                                                            | 0.967                                                                                           | 0.934                                                                                           | 0.940                                                                                           | 0.902                                                                                           |
| $\theta_{\text{min}}, \theta_{\text{max}}$ (°)                                       | 4.49 to 50                                                                                      | 4.85 to 49.994                                                                                  | 3.808 to 49.994                                                                                 | 4.458 to 50                                                                                     |
| Reflns. (all data)                                                                   | 49747                                                                                           | 55575                                                                                           | 62891                                                                                           | 112256                                                                                          |
| Reflns [ <i>I</i> ≥ 2 $\sigma$ ( <i>I</i> )]                                         | 8413                                                                                            | 8890                                                                                            | 8924                                                                                            | 9122                                                                                            |
| <i>R</i> <sub>int</sub>                                                              | 0.0940                                                                                          | 0.0864                                                                                          | 0.0580                                                                                          | 0.0968                                                                                          |
| <i>R</i> <sub>1</sub> , <i>wR</i> <sub>2</sub> [ <i>I</i> ≥ 2 $\sigma$ ( <i>I</i> )] | 0.0810, 0.2253                                                                                  | 0.0749, 0.2098                                                                                  | 0.0452, 0.1230                                                                                  | 0.0656, 0.1752                                                                                  |
| <i>R</i> <sub>1</sub> , <i>wR</i> <sub>2</sub> (all data)                            | 0.1099, 0.2488                                                                                  | 0.1024, 0.2335                                                                                  | 0.0527, 0.1276                                                                                  | 0.0831, 0.1876                                                                                  |
| GOF                                                                                  | 1.116                                                                                           | 1.119                                                                                           | 1.144                                                                                           | 1.138                                                                                           |

$$R_1 = \Sigma(|F_0| - |F_C|) / \Sigma|F_0|; wR_2 = [\Sigma w(|F_0| - |F_C|)^2 / \Sigma wF_0^2]^{1/2}.$$

**Table S7.** Selected bond lengths (Å) for compound **1-papy** before and after 808-nm laser irradiation at 78 K.

| <b>1-papy</b> <sup>78 K</sup> |          | <b>1-papy</b> <sup>808 nm</sup> |          |
|-------------------------------|----------|---------------------------------|----------|
| Co1–N1                        | 1.897(5) | Co1–N1                          | 2.093(4) |
| Co1–N1 <sup>1</sup>           | 1.897(5) | Co1–N1 <sup>1</sup>             | 2.093(4) |
| Co1–N5 <sup>2</sup>           | 1.916(6) | Co1–N5 <sup>2</sup>             | 2.102(5) |
| Co1–N5 <sup>3</sup>           | 1.916(6) | Co1–N5 <sup>3</sup>             | 2.102(5) |
| Co1–N13                       | 1.983(5) | Co1–N13 <sup>1</sup>            | 2.155(4) |
| Co1–N13 <sup>1</sup>          | 1.983(5) | Co1–N13                         | 2.155(4) |
| Co2–N16                       | 1.973(5) | Co2–N16 <sup>3</sup>            | 2.148(4) |
| Co2–N16 <sup>3</sup>          | 1.973(5) | Co2–N16                         | 2.148(4) |
| Co2–N2                        | 1.906(6) | Co2–N2 <sup>3</sup>             | 2.114(5) |
| Co2–N2 <sup>3</sup>           | 1.906(6) | Co2–N2                          | 2.114(5) |
| Co2–N6 <sup>3</sup>           | 1.889(5) | Co2–N6 <sup>3</sup>             | 2.065(4) |
| Co2–N6                        | 1.889(5) | Co2–N6                          | 2.065(4) |
| Fe2–N12                       | 1.997(5) | Fe2–N12                         | 1.992(5) |
| Fe2–N11                       | 1.992(5) | Fe2–N11                         | 1.983(4) |
| Fe2–C7                        | 1.943(6) | Fe2–C7                          | 1.960(5) |
| Fe2–C6                        | 1.879(6) | Fe2–C6                          | 1.904(5) |
| Fe2–C5                        | 1.899(7) | Fe2–C5                          | 1.917(6) |
| Fe2–C8                        | 1.939(6) | Fe2–C8                          | 1.945(6) |
| Fe1–N10                       | 1.975(5) | Fe1–N10                         | 1.976(5) |
| Fe1–N9                        | 1.979(5) | Fe1–N9                          | 1.974(4) |
| Fe1–C2                        | 1.900(7) | Fe1–C2                          | 1.914(6) |
| Fe1–C3                        | 1.940(6) | Fe1–C3                          | 1.953(6) |
| Fe1–C1                        | 1.893(6) | Fe1–C1                          | 1.912(5) |
| Fe1–C4                        | 1.955(6) | Fe1–C4                          | 1.957(6) |

Symmetry transformations used to generate equivalent atoms:

<sup>1</sup>-X, 1-Y, 1-Z; <sup>2</sup>-1+X, +Y, +Z; <sup>3</sup>1-X, 1-Y, 1-Z (**1-papy**<sup>78 K</sup>)

<sup>1</sup>-X, 1-Y, 1-Z; <sup>2</sup>-1+X, +Y, +Z; <sup>3</sup>1-X, 1-Y, 1-Z (**1-papy**<sup>808 nm</sup>)

**Table S8.** Selected bond lengths (Å) for compound **1-pepy** before and after 808-nm laser irradiation at 50 K.

| <b>1-pepy</b> <sup>50 K</sup> |          | <b>1-pepy</b> <sup>808 nm</sup> |          |
|-------------------------------|----------|---------------------------------|----------|
| Co1–N1 <sup>1</sup>           | 1.881(3) | Co1–N1                          | 2.090(4) |
| Co1–N1                        | 1.881(3) | Co1–N1 <sup>1</sup>             | 2.090(4) |
| Co1–N5 <sup>2</sup>           | 1.894(3) | Co1–N5 <sup>2</sup>             | 2.103(3) |
| Co1–N5 <sup>3</sup>           | 1.894(3) | Co1–N5 <sup>3</sup>             | 2.103(3) |
| Co1–N13 <sup>1</sup>          | 1.963(3) | Co1–N13                         | 2.142(3) |
| Co1–N13                       | 1.963(3) | Co1–N13 <sup>1</sup>            | 2.142(3) |
| Co2–N2                        | 1.904(3) | Co2–N2                          | 2.131(3) |
| Co2–N2 <sup>2</sup>           | 1.904(3) | Co2–N2 <sup>3</sup>             | 2.131(3) |
| Co2–N14 <sup>2</sup>          | 1.976(3) | Co2–N14                         | 2.162(3) |
| Co2–N14                       | 1.976(3) | Co2–N14 <sup>3</sup>            | 2.162(3) |
| Co2–N6                        | 1.882(3) | Co2–N6                          | 2.061(4) |
| Co2–N6 <sup>2</sup>           | 1.882(3) | Co2–N6 <sup>3</sup>             | 2.062(4) |
| Fe2–C6                        | 1.880(3) | Fe2–C6                          | 1.891(5) |
| Fe2–C5                        | 1.905(3) | Fe2–C5                          | 1.911(4) |
| Fe2–C7                        | 1.950(3) | Fe2–C7                          | 1.952(4) |
| Fe2–C8                        | 1.954(3) | Fe2–C8                          | 1.957(5) |
| Fe2–N12                       | 1.983(3) | Fe2–N12                         | 1.987(3) |
| Fe1–N10                       | 1.983(3) | Fe1–N10                         | 1.984(3) |
| Fe1–N9                        | 1.988(3) | Fe1–N9                          | 1.979(4) |
| Fe2–N11                       | 1.981(3) | Fe2–N11                         | 1.981(4) |
| Fe1–C1                        | 1.875(3) | Fe1–C1                          | 1.911(5) |
| Fe1–C2                        | 1.887(3) | Fe1–C2                          | 1.915(4) |
| Fe1–C4                        | 1.943(3) | Fe1–C4                          | 1.959(4) |
| Fe1–C3                        | 1.953(3) | Fe1–C3                          | 1.962(4) |

Symmetry transformations used to generate equivalent atoms:

<sup>1</sup>-X,-Y,-Z; <sup>2</sup>1-X,-Y,-Z; <sup>3</sup>-1+X,+Y,+Z (**1-pepy**<sup>50 K</sup>)

<sup>1</sup>-X,-Y,-Z; <sup>2</sup>-1+X,+Y,+Z; <sup>3</sup>1-X,-Y,-Z (**1-pepy**<sup>808 nm</sup>)

**Table S9.** Selected angles ( $^{\circ}$ ) for compound **1-papy** before and after 808-nm laser irradiation at 78 K.

| <b>1-papy</b> <sup>78 K</sup>         |           | <b>1-papy</b> <sup>808 nm</sup>       |            |
|---------------------------------------|-----------|---------------------------------------|------------|
| N1–Co1–N1 <sup>1</sup>                | 180.0(3)  | N1–Co1–N1 <sup>1</sup>                | 180.0      |
| N1 <sup>1</sup> –Co1–N5 <sup>2</sup>  | 90.9(2)   | N1 <sup>1</sup> –Co1–N5 <sup>2</sup>  | 91.51(17)  |
| N1–Co1–N5 <sup>2</sup>                | 89.1(2)   | N1–Co1–N5 <sup>2</sup>                | 88.49(17)  |
| N1 <sup>1</sup> –Co1–N5 <sup>3</sup>  | 89.1(2)   | N1 <sup>1</sup> –Co1–N5 <sup>3</sup>  | 88.49(17)  |
| N1–Co1–N5 <sup>3</sup>                | 90.9(2)   | N1–Co1–N5 <sup>3</sup>                | 91.51(17)  |
| N1 <sup>1</sup> –Co1–N13              | 90.63(19) | N1–Co1–N13 <sup>1</sup>               | 90.37(16)  |
| N1–Co1–N13                            | 89.37(19) | N1 <sup>1</sup> –Co1–N13 <sup>1</sup> | 89.63(16)  |
| N1–Co1–N13 <sup>1</sup>               | 90.63(19) | N1–Co1–N13                            | 89.63(16)  |
| N1 <sup>1</sup> –Co1–N13 <sup>1</sup> | 89.37(19) | N1 <sup>1</sup> –Co1–N13              | 90.37(16)  |
| N5 <sup>3</sup> –Co1–N5 <sup>2</sup>  | 180.0     | N5 <sup>3</sup> –Co1–N5 <sup>2</sup>  | 180.0      |
| N5 <sup>2</sup> –Co1–N13 <sup>1</sup> | 89.0(2)   | N5 <sup>2</sup> –Co1–N13 <sup>1</sup> | 88.41(18)  |
| N5 <sup>3</sup> –Co1–N13 <sup>1</sup> | 91.0(2)   | N5 <sup>2</sup> –Co1–N13              | 91.59(18)  |
| N5 <sup>3</sup> –Co1–N13              | 89.0(2)   | N5 <sup>3</sup> –Co1–N13              | 88.41(18)  |
| N5 <sup>2</sup> –Co1–N13              | 91.0(2)   | N5 <sup>3</sup> –Co1–N13 <sup>1</sup> | 91.59(18)  |
| N13–Co1–N13 <sup>1</sup>              | 180.0     | N13 <sup>1</sup> –Co1–N13             | 180.0(3)   |
| N16 <sup>3</sup> –Co2–N16             | 180.0     | N16–Co2–N16 <sup>3</sup>              | 180.0      |
| N2 <sup>3</sup> –Co2–N16 <sup>3</sup> | 87.8(2)   | N2–Co2–N16                            | 86.96(17)  |
| N2–Co2–N16 <sup>3</sup>               | 92.2(2)   | N2–Co2–N16 <sup>3</sup>               | 93.04(17)  |
| N2 <sup>3</sup> –Co2–N16              | 92.2(2)   | N2 <sup>3</sup> –Co2–N16 <sup>3</sup> | 86.96(17)  |
| N2–Co2–N16                            | 87.8(2)   | N2 <sup>3</sup> –Co2–N16              | 93.04(17)  |
| N2–Co2–N2 <sup>3</sup>                | 180.0     | N2 <sup>3</sup> –Co2–N2               | 180.0      |
| N6 <sup>3</sup> –Co2–N16 <sup>3</sup> | 89.92(19) | N6 <sup>3</sup> –Co2–N16              | 90.30(17)  |
| N6–Co2–N16 <sup>3</sup>               | 90.08(19) | N6–Co2–N16                            | 89.70(17)  |
| N6 <sup>3</sup> –Co2–N16              | 90.08(19) | N6 <sup>3</sup> –Co2–N16 <sup>3</sup> | 89.70(17)  |
| N6–Co2–N16                            | 89.92(19) | N6–Co2–N16 <sup>3</sup>               | 90.30(17)  |
| N6 <sup>3</sup> –Co2–N2 <sup>3</sup>  | 89.4(2)   | N6 <sup>3</sup> –Co2–N2               | 91.28(17)  |
| N6–Co2–N2 <sup>3</sup>                | 90.6(2)   | N6 <sup>3</sup> –Co2–N2 <sup>3</sup>  | 88.72(17)  |
| N6–Co2–N2                             | 89.4(2)   | N6–Co2–N2 <sup>3</sup>                | 91.28(17)  |
| N6 <sup>3</sup> –Co2–N2               | 90.6(2)   | N6–Co2–N2                             | 88.72(17)  |
| N6–Co2–N6 <sup>3</sup>                | 180.0(3)  | N6–Co2–N6 <sup>3</sup>                | 180.0(2)   |
| $\Sigma_{\text{Co1}}$                 | 10.12     | $\Sigma_{\text{Co1}}$                 | 13.88      |
| $\Sigma_{\text{Co2}}$                 | 11.52     | $\Sigma_{\text{Co2}}$                 | 18.48      |
| N11–Fe2–N12                           | 80.8(2)   | N11–Fe2–N12                           | 81.02(18)  |
| C7–Fe2–N12                            | 91.6(2)   | C7–Fe2–N12                            | 92.0(2)    |
| C7–Fe2–N11                            | 93.6(2)   | C7–Fe2–N11                            | 94.07(18)  |
| C6–Fe2–N12                            | 94.3(2)   | C6–Fe2–N12                            | 95.9(2)    |
| C6–Fe2–N11                            | 174.6(2)  | C6–Fe2–N11                            | 176.5(2)   |
| C6–Fe2–C7                             | 88.9(2)   | C6–Fe2–C7                             | 87.6(2)    |
| C6–Fe2–C5                             | 88.3(2)   | C6–Fe2–C5                             | 84.5(2)    |
| C6–Fe2–C8                             | 88.6(2)   | C6–Fe2–C8                             | 88.3(2)    |
| C5–Fe2–N12                            | 177.1(2)  | C5–Fe2–N12                            | 178.17(19) |
| C5–Fe2–N11                            | 96.5(2)   | C5–Fe2–N11                            | 98.5(2)    |
| C5–Fe2–C7                             | 89.6(3)   | C5–Fe2–C7                             | 89.8(2)    |
| C5–Fe2–C8                             | 87.0(3)   | C5–Fe2–C8                             | 87.3(2)    |
| C8–Fe2–N12                            | 91.8(2)   | C8–Fe2–N12                            | 90.9(2)    |
| C8–Fe2–N11                            | 89.1(2)   | C8–Fe2–N11                            | 90.11(19)  |
| C8–Fe2–C7                             | 175.9(2)  | C8–Fe2–C7                             | 175.3(2)   |
| N10–Fe1–N9                            | 81.9(2)   | N9–Fe1–N10                            | 82.05(19)  |
| C2–Fe1–N10                            | 177.7(2)  | C2–Fe1–N10                            | 179.0(2)   |
| C2–Fe1–N9                             | 96.7(2)   | C2–Fe1–N9                             | 97.6(2)    |
| C2–Fe1–C3                             | 90.2(2)   | C2–Fe1–C3                             | 90.8(2)    |
| C2–Fe1–C4                             | 91.2(2)   | C2–Fe1–C4                             | 91.9(2)    |
| C3–Fe1–N10                            | 88.0(2)   | C3–Fe1–N10                            | 88.2(2)    |
| C3–Fe1–N9                             | 89.3(2)   | C3–Fe1–N9                             | 89.50(19)  |



|                        |          |                        |           |
|------------------------|----------|------------------------|-----------|
| C3–Fe1–C4              | 178.1(2) | C3–Fe1–C4              | 177.3(2)  |
| C1–Fe1–N10             | 95.4(2)  | C1–Fe1–N10             | 97.2(2)   |
| C1–Fe1–N9              | 177.3(2) | C1–Fe1–N9              | 179.1(2)  |
| C1–Fe1–C2              | 85.9(2)  | C1–Fe1–C2              | 83.2(2)   |
| C1–Fe1–C3              | 90.1(2)  | C1–Fe1–C3              | 90.0(2)   |
| C1–Fe1–C4              | 91.3(2)  | C1–Fe1–C4              | 90.7(2)   |
| C4–Fe1–N10             | 90.7(2)  | C4–Fe1–N10             | 89.0(2)   |
| C4–Fe1–N9              | 89.2(2)  | C4–Fe1–N9              | 89.81(18) |
| $\Sigma_{\text{Fe2}}$  | 35.5     | $\Sigma_{\text{Fe2}}$  | 42.96     |
| $\Sigma_{\text{Fe1}}$  | 31.3     | $\Sigma_{\text{Fe1}}$  | 36.44     |
| C1–N1–Co1              | 168.1(4) | C1–N1–Co1              | 165.3(4)  |
| C2–N2–Co2              | 162.5(4) | C2–N2–Co2              | 159.4(4)  |
| C5–N5–Co1 <sup>4</sup> | 173.6(5) | C5–N5–Co1 <sup>4</sup> | 176.2(5)  |
| C6–N6–Co2              | 172.8(5) | C6–N6–Co2              | 170.5(4)  |
| N2–C2–Fe1              | 175.4(5) | N2–C2–Fe1              | 176.3(4)  |
| N7–C7–Fe2              | 177.4(5) | N7–C7–Fe2              | 176.1(4)  |
| N6–C6–Fe2              | 179.3(5) | N6–C6–Fe2              | 179.0(5)  |
| N3–C3–Fe1              | 177.1(5) | N3–C3–Fe1              | 177.0(5)  |
| N5–C5–Fe2              | 177.5(5) | N5–C5–Fe2              | 176.7(5)  |
| N8–C8–Fe2              | 178.5(6) | N8–C8–Fe2              | 179.1(7)  |
| N1–C1–Fe1              | 176.1(5) | N1–C1–Fe1              | 176.3(4)  |
| N4–C4–Fe1              | 178.1(5) | N4–C4–Fe1              | 177.2(5)  |

---

Symmetry transformations used to generate equivalent atoms:

<sup>1</sup>-X, 1-Y, 1-Z; <sup>2</sup>-1+X, +Y, +Z; <sup>3</sup>1-X, 1-Y, 1-Z; <sup>4</sup>1+X, +Y, +Z (**1-papy**<sup>78 K</sup>)

<sup>1</sup>-X, 1-Y, 1-Z; <sup>2</sup>-1+X, +Y, +Z; <sup>3</sup>1-X, 1-Y, 1-Z; <sup>4</sup>1+X, +Y, +Z (**1-papy**<sup>808 nm</sup>)

**Table S10.** Selected angles ( $^{\circ}$ ) for compound **1-pepy** before and after 808-nm laser irradiation at 50 K.

| <b>1-pepy</b> <sup>50 K</sup>         |            | <b>1-pepy</b> <sup>808 nm</sup>       |            |
|---------------------------------------|------------|---------------------------------------|------------|
| N1 <sup>1</sup> -Co1-N1               | 180.00(13) | N1-Co1-N1 <sup>1</sup>                | 180.0      |
| N1-Co1-N5 <sup>2</sup>                | 91.35(11)  | N1-Co1-N5 <sup>2</sup>                | 92.18(13)  |
| N1-Co1-N5 <sup>3</sup>                | 88.65(11)  | N1 <sup>1</sup> -Co1-N5 <sup>2</sup>  | 87.82(13)  |
| N1 <sup>1</sup> -Co1-N5 <sup>2</sup>  | 88.65(11)  | N1-Co1-N5 <sup>3</sup>                | 87.82(13)  |
| N1 <sup>1</sup> -Co1-N5 <sup>3</sup>  | 91.35(11)  | N1 <sup>1</sup> -Co1-N5 <sup>3</sup>  | 92.18(13)  |
| N1 <sup>1</sup> -Co1-N13              | 90.40(10)  | N1 <sup>1</sup> -Co1-N13              | 90.87(13)  |
| N1 <sup>1</sup> -Co1-N13 <sup>1</sup> | 89.60(10)  | N1-Co1-N13                            | 89.13(13)  |
| N1-Co1-N13                            | 89.60(10)  | N1-Co1-N13 <sup>1</sup>               | 90.87(13)  |
| N1-Co1-N13 <sup>1</sup>               | 90.40(10)  | N1 <sup>1</sup> -Co1-N13 <sup>1</sup> | 89.13(13)  |
| N5 <sup>2</sup> -Co1-N5 <sup>3</sup>  | 180.0(2)   | N5 <sup>2</sup> -Co1-N5 <sup>3</sup>  | 180.0(3)   |
| N5 <sup>2</sup> -Co1-N13              | 89.56(11)  | N5 <sup>2</sup> -Co1-N13              | 90.16(13)  |
| N5 <sup>3</sup> -Co1-N13              | 90.44(11)  | N5 <sup>3</sup> -Co1-N13 <sup>1</sup> | 90.16(13)  |
| N5 <sup>3</sup> -Co1-N13 <sup>1</sup> | 89.56(11)  | N5 <sup>2</sup> -Co1-N13 <sup>1</sup> | 89.84(13)  |
| N5 <sup>2</sup> -Co1-N13 <sup>1</sup> | 90.44(11)  | N5 <sup>3</sup> -Co1-N13              | 89.84(13)  |
| N13-Co1-N13 <sup>1</sup>              | 180.0      | N13-Co1-N13 <sup>1</sup>              | 180.0      |
| N2-Co2-N2 <sup>2</sup>                | 180.0      | N2 <sup>2</sup> -Co2-N2               | 180.0      |
| N2 <sup>2</sup> -Co2-N14 <sup>2</sup> | 86.72(11)  | N2 <sup>2</sup> -Co2-N14              | 95.26(13)  |
| N2 <sup>2</sup> -Co2-N14              | 93.28(11)  | N2-Co2-N14 <sup>2</sup>               | 95.26(13)  |
| N2-Co2-N14 <sup>2</sup>               | 93.28(11)  | N2 <sup>2</sup> -Co2-N14 <sup>2</sup> | 84.74(13)  |
| N2-Co2-N14                            | 86.72(11)  | N2-Co2-N14                            | 84.74(13)  |
| N14 <sup>2</sup> -Co2-N14             | 180.0      | N14 <sup>2</sup> -Co2-N14             | 180.0(2)   |
| N6-Co2-N2                             | 89.07(10)  | N6-Co2-N2                             | 88.21(14)  |
| N6 <sup>2</sup> -Co2-N2               | 90.93(10)  | N6 <sup>2</sup> -Co2-N2               | 91.79(14)  |
| N6 <sup>2</sup> -Co2-N2 <sup>2</sup>  | 89.07(10)  | N6-Co2-N2 <sup>2</sup>                | 91.79(14)  |
| N6-Co2-N2 <sup>2</sup>                | 90.93(10)  | N6 <sup>2</sup> -Co2-N2 <sup>2</sup>  | 88.21(14)  |
| N6 <sup>2</sup> -Co2-N14              | 90.11(11)  | N6 <sup>2</sup> -Co2-N14              | 90.46(14)  |
| N6-Co2-N14                            | 89.89(11)  | N6-Co2-N14                            | 89.54(14)  |
| N6-Co2-N14 <sup>2</sup>               | 90.11(11)  | N6 <sup>2</sup> -Co2-N14 <sup>2</sup> | 89.54(14)  |
| N6 <sup>2</sup> -Co2-N14 <sup>2</sup> | 89.89(11)  | N6-Co2-N14 <sup>2</sup>               | 90.46(14)  |
| N6 <sup>2</sup> -Co2-N6               | 180.0      | N6-Co2-N6 <sup>2</sup>                | 180.0      |
| $\Sigma_{\text{Co1}}$                 | 8.76       | $\Sigma_{\text{Co1}}$                 | 12.84      |
| $\Sigma_{\text{Co2}}$                 | 17.28      | $\Sigma_{\text{Co2}}$                 | 30.04      |
| C6-Fe2-C5                             | 86.94(12)  | C6-Fe2-C5                             | 83.72(17)  |
| C6-Fe2-C7                             | 90.12(13)  | C6-Fe2-C7                             | 89.09(17)  |
| C6-Fe2-C8                             | 88.91(13)  | C6-Fe2-C8                             | 88.96(18)  |
| C6-Fe2-N12                            | 94.79(12)  | C6-Fe2-N12                            | 96.25(16)  |
| C6-Fe2-N11                            | 175.40(12) | C6-Fe2-N11                            | 176.79(15) |
| C5-Fe2-C7                             | 88.70(13)  | C5-Fe2-C7                             | 87.95(16)  |
| C5-Fe2-C8                             | 87.08(13)  | C5-Fe2-C8                             | 88.56(16)  |
| C5-Fe2-N12                            | 178.18(11) | C5-Fe2-N12                            | 178.55(15) |
| C5-Fe2-N11                            | 97.03(12)  | C5-Fe2-N11                            | 98.85(16)  |
| C7-Fe2-C8                             | 175.72(13) | C7-Fe2-C8                             | 176.17(16) |
| C7-Fe2-N12                            | 90.73(12)  | C7-Fe2-N12                            | 90.60(15)  |
| C7-Fe2-N11                            | 92.29(12)  | C7-Fe2-N11                            | 92.90(16)  |
| C8-Fe2-N12                            | 93.50(12)  | C8-Fe2-N12                            | 92.89(15)  |
| C8-Fe2-N11                            | 88.97(12)  | C8-Fe2-N11                            | 89.20(16)  |
| N11-Fe2-N12                           | 81.26(11)  | N11-Fe2-N12                           | 81.22(15)  |
| C1-Fe1-C2                             | 85.83(12)  | C1-Fe1-C2                             | 82.10(17)  |
| C1-Fe1-C4                             | 90.82(13)  | C1-Fe1-C4                             | 90.58(17)  |
| C1-Fe1-C3                             | 89.41(13)  | C1-Fe1-C3                             | 88.37(17)  |
| C1-Fe1-N10                            | 95.93(12)  | C1-Fe1-N10                            | 98.20(16)  |
| C1-Fe1-N9                             | 177.09(12) | C1-Fe1-N9                             | 179.30(15) |
| C2-Fe1-C4                             | 89.99(13)  | C2-Fe1-C4                             | 90.99(16)  |
| C2-Fe1-C3                             | 92.74(13)  | C2-Fe1-C3                             | 93.57(16)  |

|                        |            |                        |            |
|------------------------|------------|------------------------|------------|
| C2–Fe1–N10             | 178.21(12) | C2–Fe1–N10             | 178.99(15) |
| C2–Fe1–N9              | 97.06(12)  | C2–Fe1–N9              | 98.15(16)  |
| C4–Fe1–C3              | 177.26(13) | C4–Fe1–C3              | 175.14(17) |
| C4–Fe1–N10             | 90.26(12)  | C4–Fe1–N10             | 88.04(15)  |
| C4–Fe1–N9              | 89.43(12)  | C4–Fe1–N9              | 90.07(16)  |
| C3–Fe1–N10             | 87.00(12)  | C3–Fe1–N10             | 87.41(15)  |
| C3–Fe1–N9              | 90.21(12)  | C3–Fe1–N9              | 90.96(16)  |
| N10–Fe1–N9             | 81.17(11)  | N9–Fe1–N10             | 81.55(15)  |
| $\Sigma_{\text{Fe2}}$  | 36.6       | $\Sigma_{\text{Fe2}}$  | 42.79      |
| $\Sigma_{\text{Fe1}}$  | 34.19      | $\Sigma_{\text{Fe1}}$  | 45.05      |
| N1–C1–Fe1              | 176.2(3)   | N1–C1–Fe1              | 175.8(3)   |
| N2–C2–Fe1              | 177.2(3)   | N2–C2–Fe1              | 177.8(4)   |
| N6–C6–Fe2              | 178.4(3)   | N4–C4–Fe1              | 175.0(3)   |
| N5–C5–Fe2              | 177.8(3)   | N3–C3–Fe1              | 175.3(4)   |
| N7–C7–Fe2              | 177.9(3)   | N6–C6–Fe2              | 179.4(4)   |
| N8–C8–Fe2              | 175.3(3)   | N5–C5–Fe2              | 176.3(4)   |
| N4–C4–Fe1              | 177.8(3)   | N7–C7–Fe2              | 177.2(4)   |
| N3–C3–Fe1              | 174.7(3)   | N8–C8–Fe2              | 178.5(4)   |
| C1–N1–Co1              | 169.9(3)   | C1–N1–Co1              | 169.3(3)   |
| C5–N5–Co1 <sup>4</sup> | 175.9(2)   | C5–N5–Co1 <sup>4</sup> | 174.9(3)   |
| C2–N2–Co2              | 158.1(2)   | C2–N2–Co2              | 156.8(3)   |
| C6–N6–Co2              | 175.6(2)   | C6–N6–Co2              | 177.0(3)   |

Symmetry transformations used to generate equivalent atoms:

<sup>1</sup>-X,-Y,-Z; <sup>2</sup>1-X,-Y,-Z; <sup>3</sup>-1+X,+Y,+Z; <sup>4</sup>1+X,+Y,+Z (**1-pepy**<sup>50 K</sup>)

<sup>1</sup>-X,-Y,-Z; <sup>2</sup>1-X,-Y,-Z; <sup>3</sup>-1+X,+Y,+Z; <sup>4</sup>1+X,+Y,+Z (**1-pepy**<sup>808 nm</sup>)

**Table S11.** Selected average coordination bond lengths, interchain contact distances around the Co sites, distortion parameters, and cell volume before and after irradiation at 78 and 50 K for **1-papy** and **1-pepy**, respectively.

|                                                         | <b>1-papy</b> <sup>78 K</sup> | <b>1-papy</b> <sup>808 nm</sup> | <b>1-pepy</b> <sup>50 K</sup> | <b>1-pepy</b> <sup>808 nm</sup> |
|---------------------------------------------------------|-------------------------------|---------------------------------|-------------------------------|---------------------------------|
| Av. Co–N <sub>CN</sub> (Å)                              | 1.902(5)                      | 2.094(4)                        | 1.890(3)                      | 2.096(4)                        |
| Av. Co–N <sub>L</sub> (Å)                               | 1.978(5)                      | 2.152(4)                        | 1.969(3)                      | 2.152(3)                        |
| Σ <sub>Co1</sub> (°) <sup>[a]</sup>                     | 10.12                         | 13.88                           | 8.76                          | 12.84                           |
| Σ <sub>Co2</sub> (°)                                    | 11.52                         | 18.48                           | 17.28                         | 30.04                           |
| θ <sub>co1</sub> (°) <sup>[a]</sup>                     | 20.67                         | 20.85                           | 20.85                         | 21.71                           |
| θ <sub>co2</sub> (°)                                    | 25.19                         | 30.36                           | 33.56                         | 49.07                           |
| π <sub>L</sub> ⋯π <sub>L</sub> (Å) <sup>[b]</sup>       | 3.726(4)                      | 3.688(4)                        | 3.776(1)                      | 3.766(1)                        |
| Its dihedral angles (°) <sup>[c]</sup>                  | 165.46                        | 166.07                          | 161.72                        | 159.29                          |
| π <sub>bipy</sub> ⋯π <sub>bipy</sub> (Å) <sup>[b]</sup> | 3.838(4)                      | 3.771(4)                        | 3.8872(1)                     | 3.8266(3)                       |
| Its dihedral angles (°) <sup>[c]</sup>                  | 180.0                         | 180.0                           | 161.72                        | 180.0                           |
| Cell volume (Å <sup>3</sup> ) <sup>[d]</sup>            | 2479.5(5)                     | 2566.4(4)                       | 2545.68(16)                   | 2654.9(4)                       |

[a] Distortion parameters of  $\Sigma = \left( \sum_{i=1}^{12} |90 - \alpha_i| \right)$  and  $\Theta = \left( \sum_{j=1}^{24} |60 - \theta_j| \right)$  are the sums of twelve *cis*-N–Co–N angles ( $\alpha_i$ ) and twenty-four unique N–Co–N angles ( $\theta_j$ ) measured on the projection of two triangular faces of the octahedron along their common pseudo-threefold axis, respectively. [b] The interchain  $\pi_L \cdots \pi_L$  and  $\pi_{bipy} \cdots \pi_{bipy}$  distances are calculated by the distances between centers of the corresponding aromatic rings. [c] The dihedral angles of the interacting aromatic rings. [d] The numbers of molecules in the unit cell are 2 for **1-papy** and **1-pepy**.

## Schemes of interchain $\pi \cdots \pi$ stacks

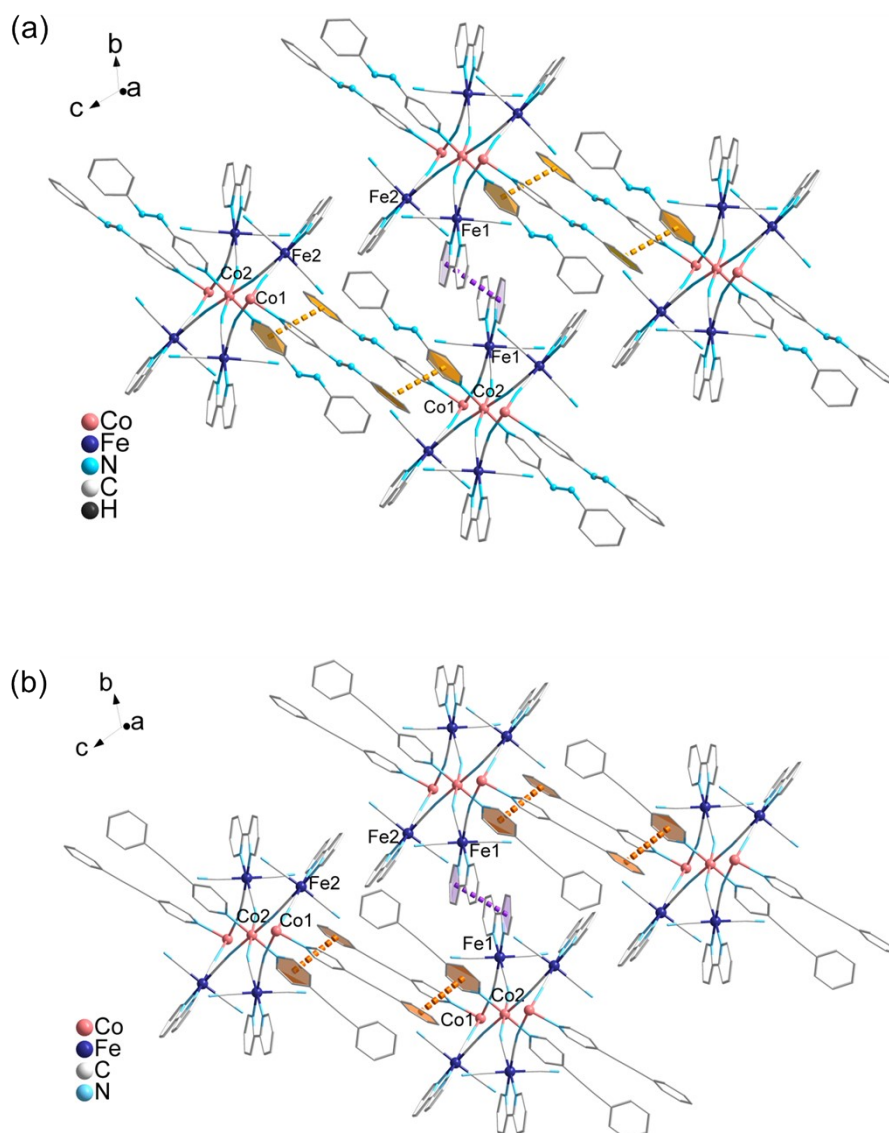

**Figure S1.** Interchain  $\pi \cdots \pi$  interactions for **1-papy** (a) and **1-pepy** (b). Orange-dash: interchain  $\pi_L \cdots \pi_L$  contacts of the phenyl and pyridyl rings coordinating to Co1 and Co2 ions, respectively. Purple-dash: interchain  $\pi_{\text{bipy}} \cdots \pi_{\text{bipy}}$  contacts of the bipyridine rings coordinating to Fe1 ions.

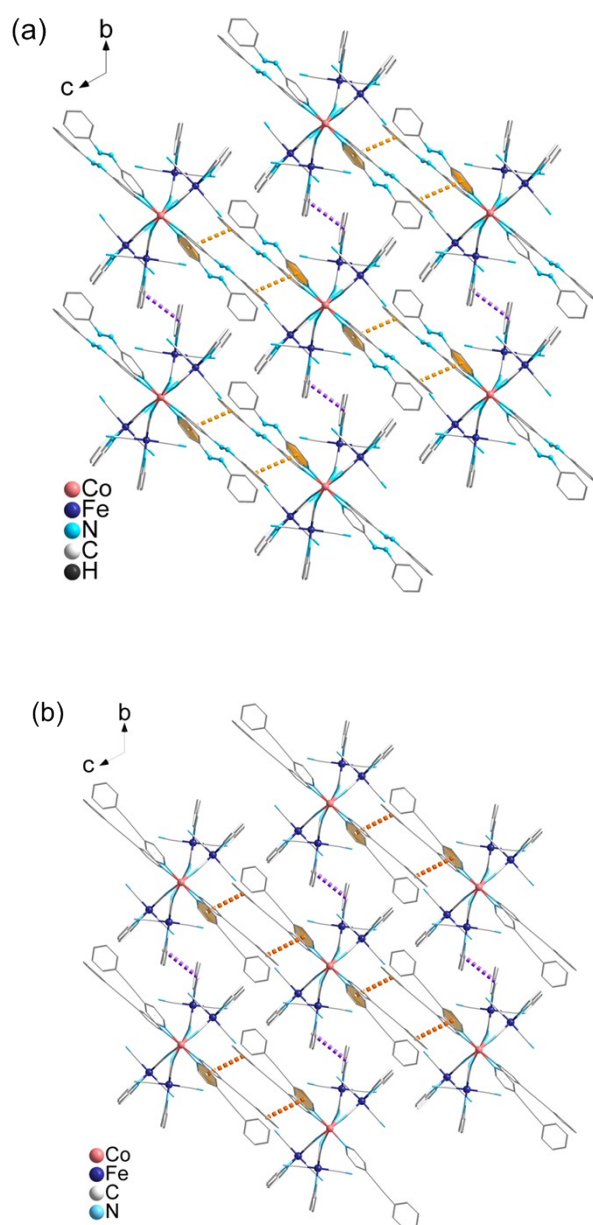

**Figure S2.** View of packing diagrams with the  $\pi \cdots \pi$  interaction network in the neighbouring chains for (a) **1-papy** and (b) **1-pepy** along the crystallographic *a*-axis.

## <sup>57</sup>Fe Mössbauer spectra for LT and HT phases

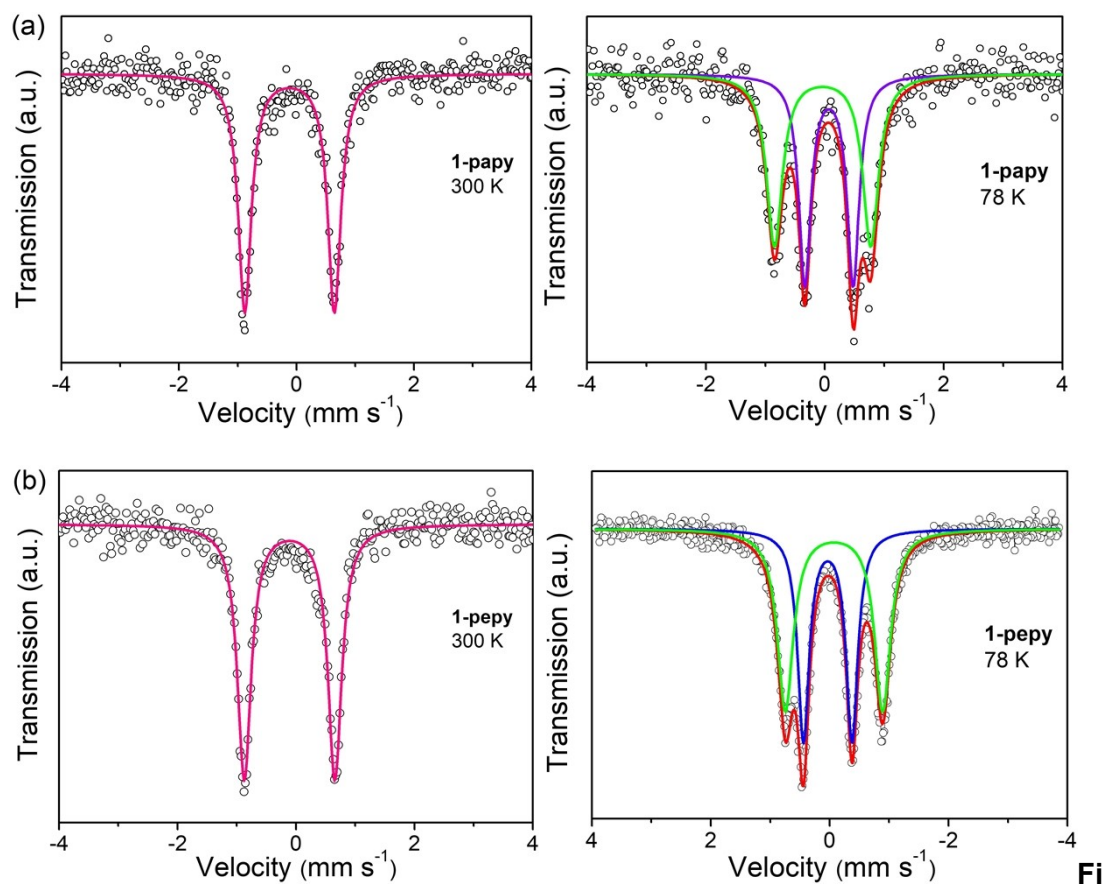

Figure S3. <sup>57</sup>Fe Mössbauer spectra of 1-papy (a) and 1-pepy (b) collected at 300 and 78 K.

## UV-vis-NIR absorption spectra

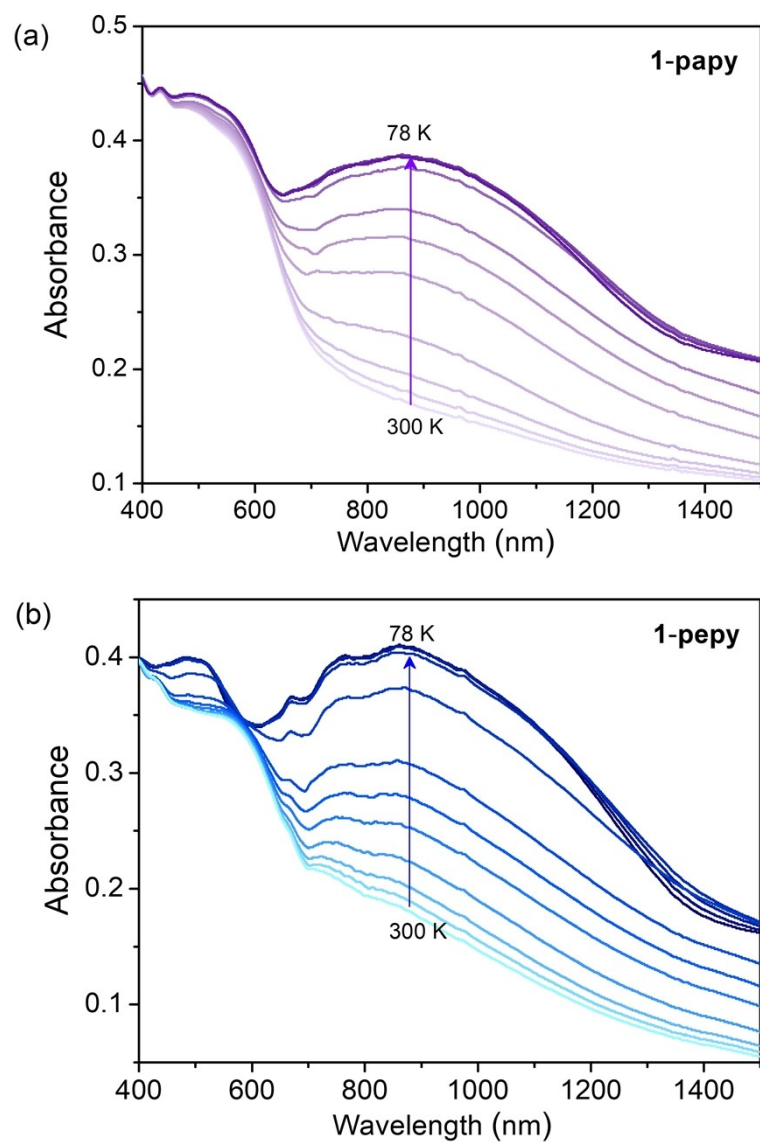

**Figure S4.** Variable temperature solid-state UV-vis-NIR absorption spectra from 300 K to 78 K for **1-papy** (a) and **1-pepy** (b).



## Single-chain magnetic properties for the photo-excited HS\* phases

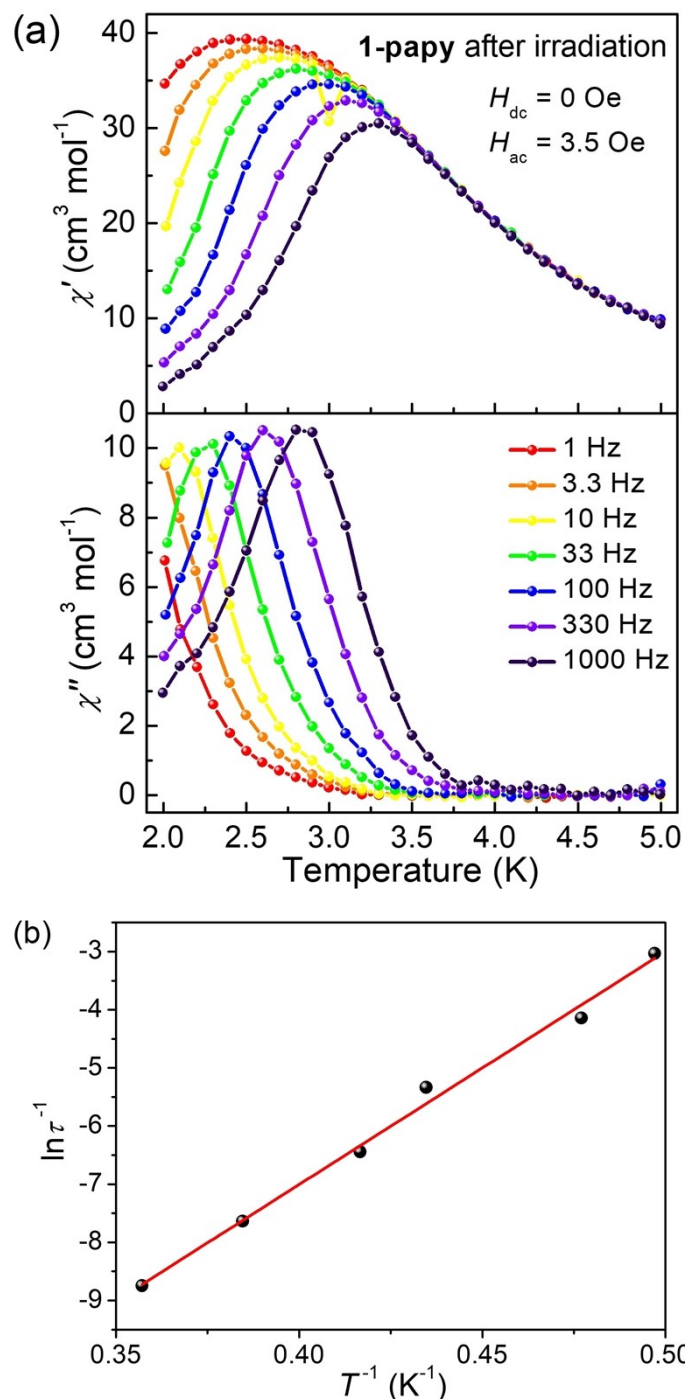

**Figure S5.** (a) Temperature dependence of the in-phase  $\chi'$  and out-of-phase  $\chi''$  components of ac magnetic susceptibility under a 3.5 Oe oscillating field for the photo-induced HS\* phase after 808-nm irradiation at 78 K of **1-papy**. (b) Arrhenius plots for the magnetic relaxation process for the photo-induced HS\* phase after 946-nm irradiation at 78 K of **1-papy**.

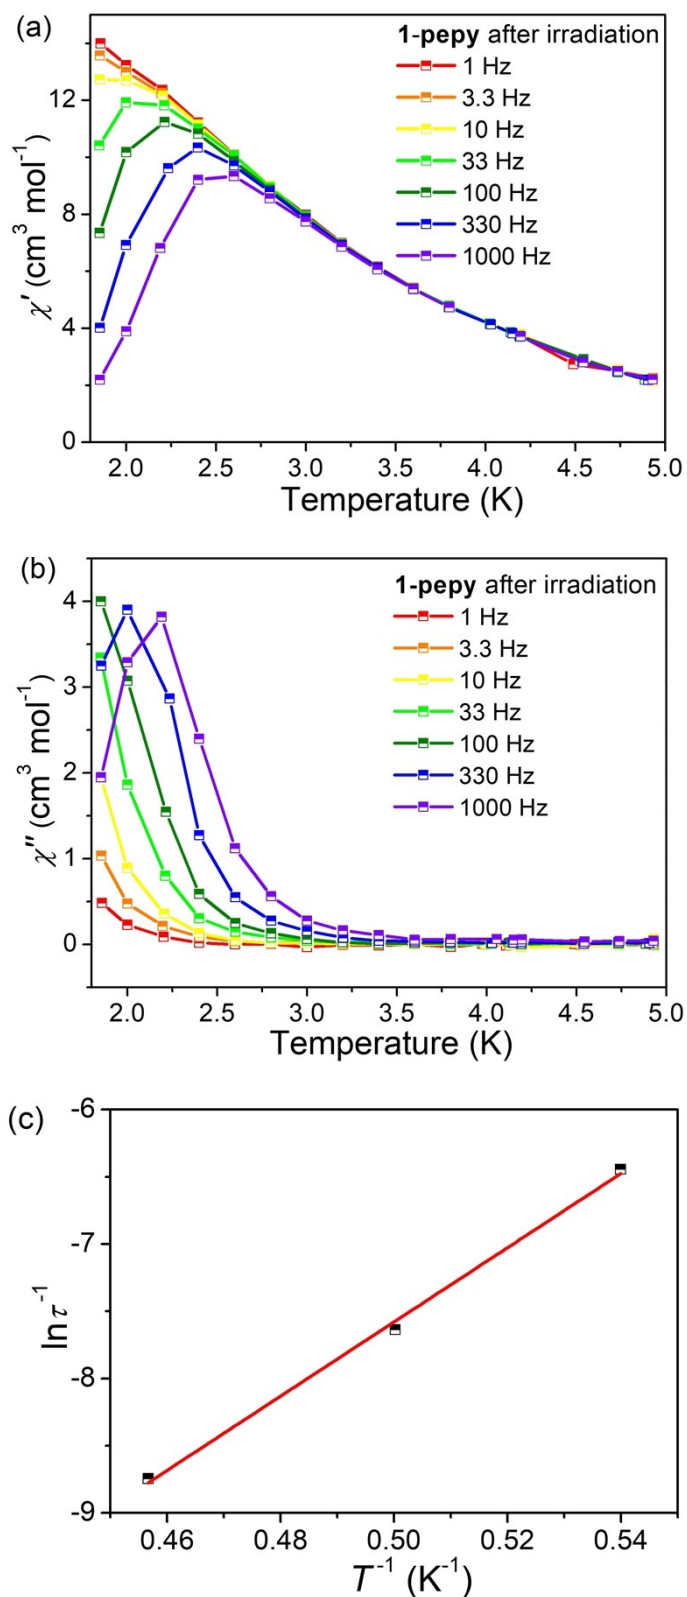

**Figure S6.** Temperature dependence of the in-phase  $\chi'$  (a) and out-of-phase  $\chi''$  (b) components of ac magnetic susceptibility under a 3.5 Oe oscillating field for the photo-induced HS\* phase after irradiation of **1-pepy**. (c) Arrhenius plots for the magnetic relaxation process in the photo-generated HS\* phases after irradiation at 10 K.

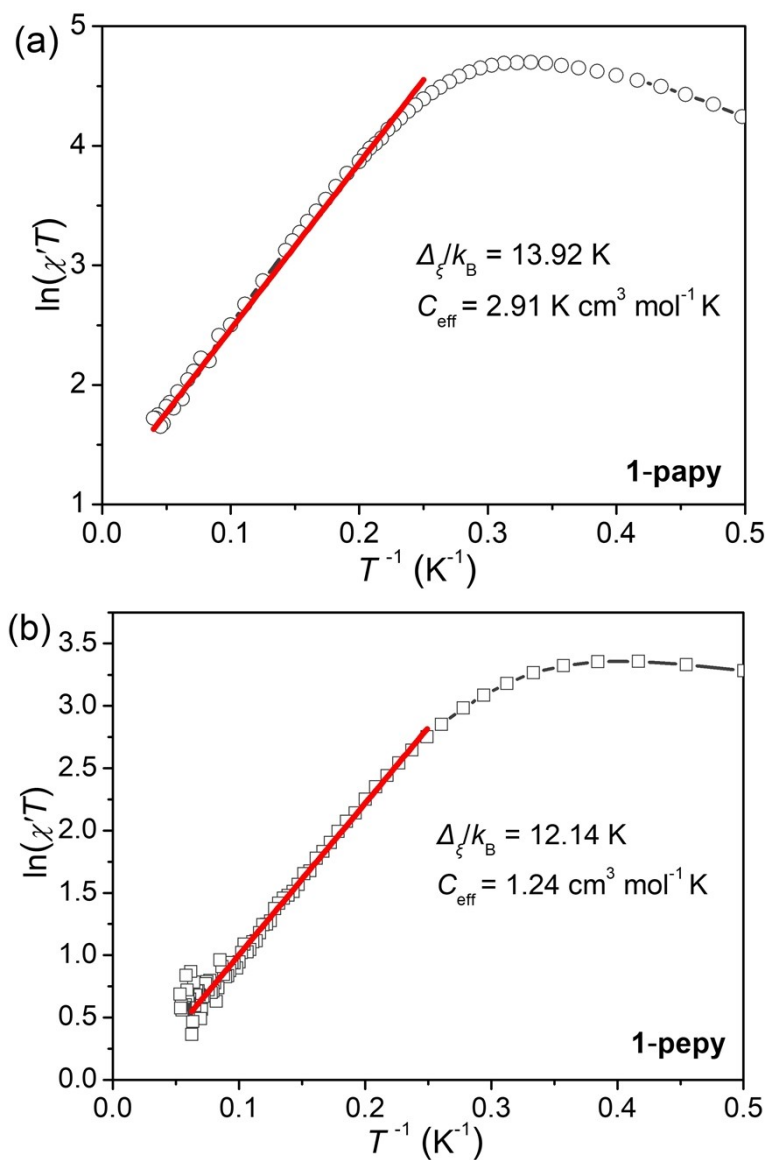

**Figure S7.** Plots of  $\ln(\chi'T)$  versus  $T^{-1}$  for the photo--induced HS\* chains after irradiation under 808 nm laser. The red solid lines represent fitting with the equation  $\chi'T/C_{\text{eff}} = \exp(\Delta_{\xi}/k_B T)$  between 4 and 25 K for **1-papy** and between 4 and 15 K for **1-pepy**.

## Reference:

- [1] R. Lescouëzec, F. Lloret, M. Julve, J. Vaissermann, M. Verdaguer, R. Llusar, S. Uriel, *Inorg. Chem.* **2001**, *40*, 2065-2072.
- [2] G. A. Bain, J. F. Berry, *J. Chem. Edu.* **2008**, *85*, 532.
